# Supplementary material for: Thinking Journals (Professional Books).
Source: Royal Society of Chemistry journal article supplement (doi:10.1039/d4cp01606h), 1998-01-01
Supplement: d4cp01606h1.pdf [file d4cp01606h1.pdf]

# **Bimetal loaded graphitic carbon nitride with synergistic enhanced peroxidase-like activity for colorimetric detection of p-phenylenediamine**

Jianshuai Mu<sup>a,d</sup>, Mengjiao Ren<sup>a</sup>, Ning Li<sup>a</sup>, Tengyi Zhao<sup>a</sup>, Zhong-Yi Liu<sup>a</sup>, Jingwen Ma<sup>a</sup>, Shulai Lei<sup>c</sup>, Jiajun Wang<sup>a,\*</sup>, En-Cui Yang<sup>a,\*</sup>, Yan Wang<sup>b,\*</sup>

<sup>a</sup> *Academy of Interdisciplinary Studies on Intelligent Molecules, College of Chemistry, Tianjin Key Laboratory of Structure and Performance for Functional Molecules, Tianjin Normal University, Tianjin 300387, China*

<sup>b</sup> *School of Chemistry and Chemical Engineering, Harbin Institute of Technology, Harbin 150001, China*

<sup>c</sup> *Hubei Key Laboratory of Low Dimensional Optoelectronic Materials and Devices, Hubei University of Arts and Science, Xiangyang 441053, China*

<sup>d</sup> *Tianjin Saina Enzyme Technology Co., Ltd, Tianjin 300192, Peoples R China*

Corresponding author.

*E-mail addresses:* [hxywj@tjnu.edu.cn](mailto:hxywj@tjnu.edu.cn) (J. Wang), [encui\\_yang@163.com](mailto:encui_yang@163.com) (E.-C. Yang), [wangy\\_msn@hit.edu.cn](mailto:wangy_msn@hit.edu.cn) (Y. Wang).

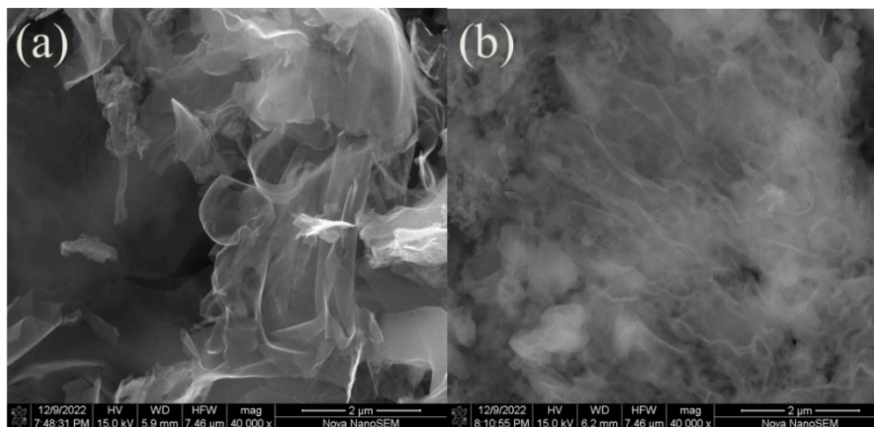

**Fig. S1** (a) SEM of pristine CN and (b) Fe/Ni-CN.

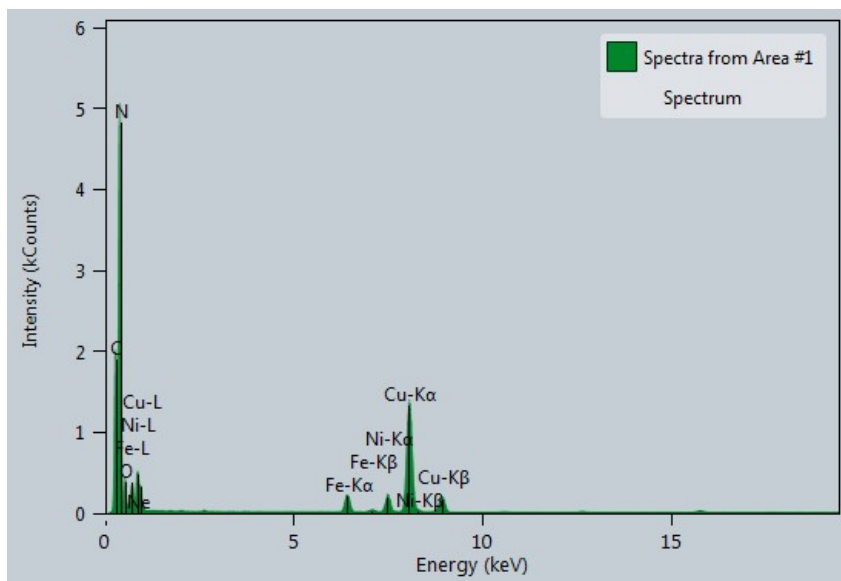

**Fig. S2** EDS spectrum of Fe/Ni-CN.

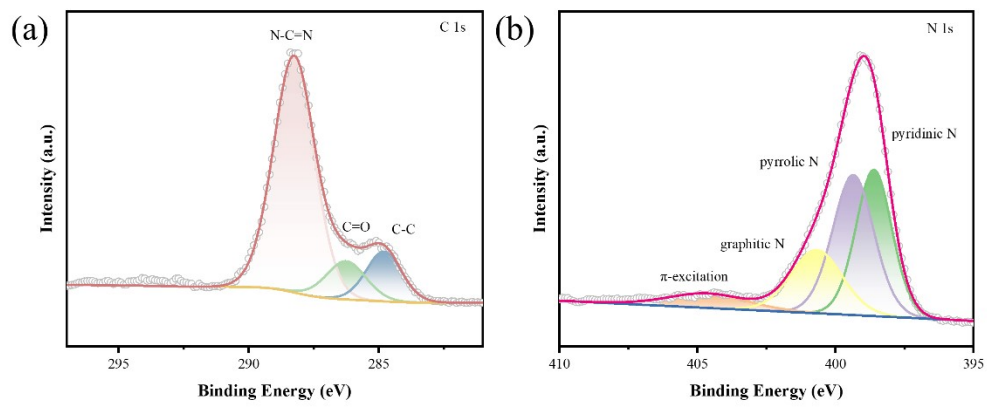

**Fig. S3** XPS spectra of C 1s (a) and N 1s (b).

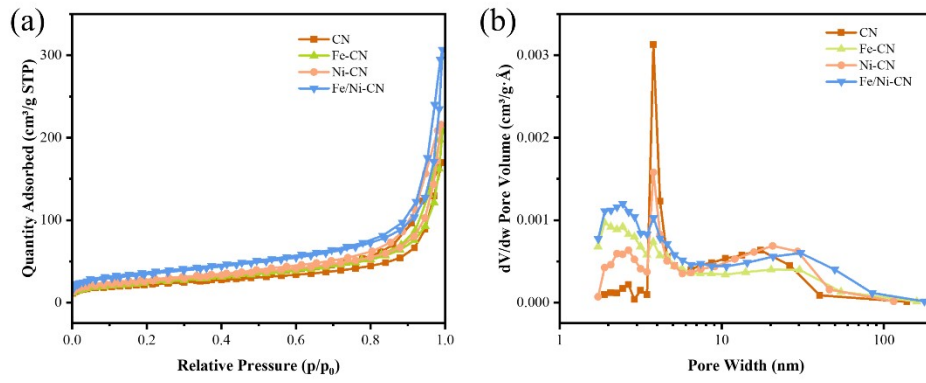

**Fig. S4** (a)  $N_2$  adsorption/desorption isotherms of CN, Fe-CN, Ni-CN and Fe/Ni-CN and (b) the corresponding pore-size distribution curves.

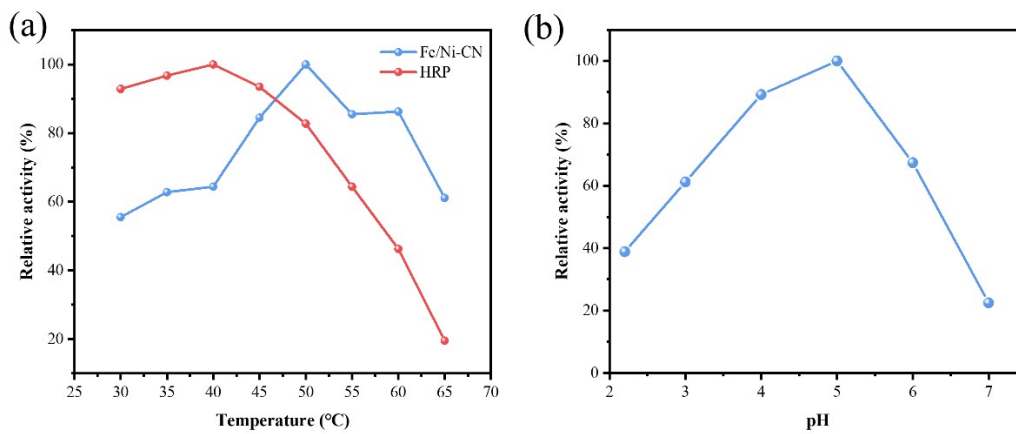

**Fig. S5** (a) Comparison of Fe/Ni-CN and HRP under varying temperature, (b) The influence of pH on the catalytic activity of Fe/Ni-CN.

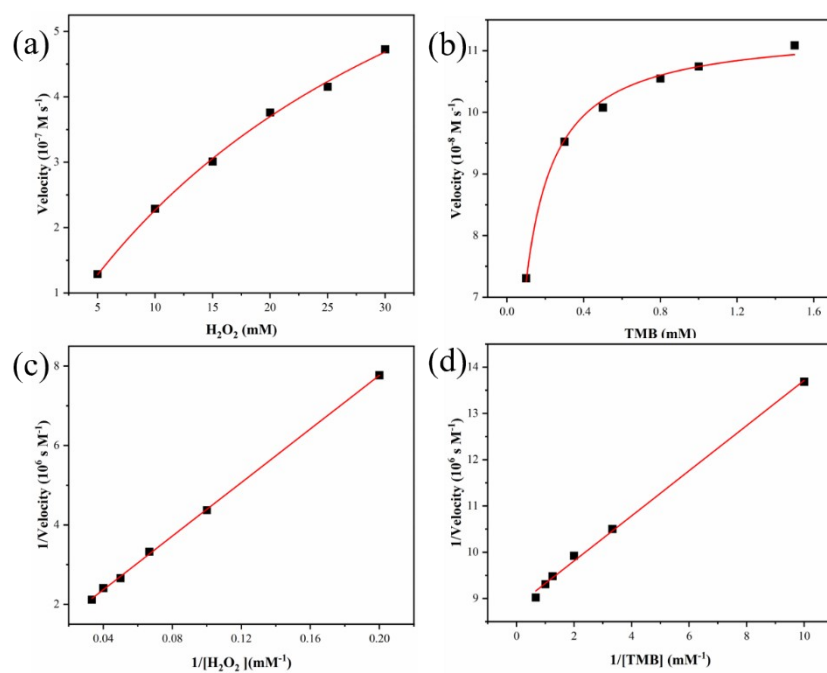

**Fig. S6** Steady-state kinetics of Fe-CN nanozyme. (a and b) Michaelis–Menten curves fit for varied concentrations of  $\text{H}_2\text{O}_2$  with fixed concentration of TMB, and varied concentrations of TMB with fixed concentration of  $\text{H}_2\text{O}_2$ . The Lineweaver–Burk plots for various concentrations of (c)  $\text{H}_2\text{O}_2$  and (d) TMB.

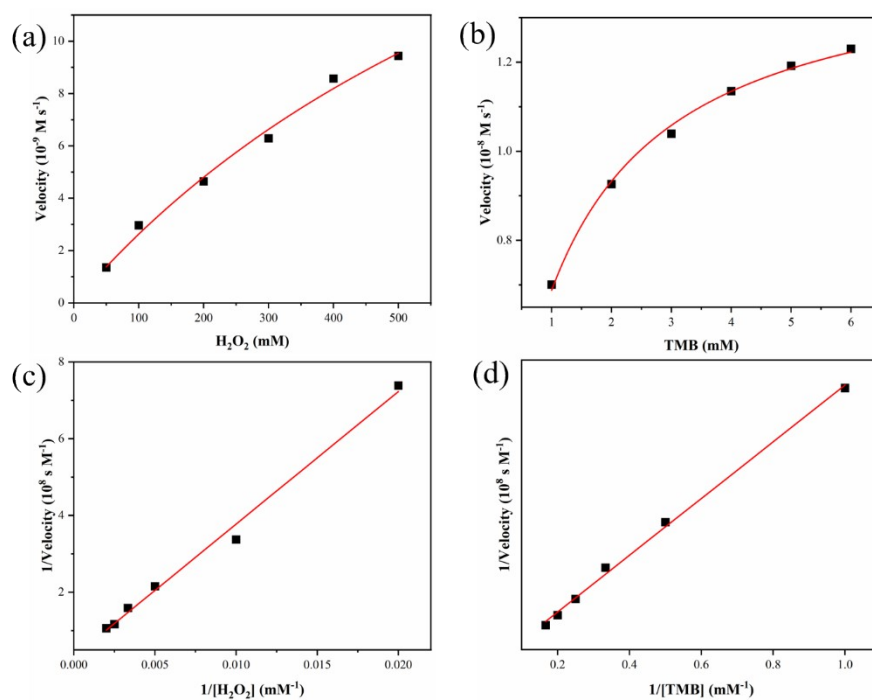

**Fig. S7** Steady-state kinetics of Ni-CN nanozyme. (a and b) Michaelis–Menten curves fit for varied concentrations of  $\text{H}_2\text{O}_2$  with fixed concentration of TMB, and varied concentrations of TMB with fixed concentration of  $\text{H}_2\text{O}_2$ . The Lineweaver–Burk plots for various concentrations of (c)  $\text{H}_2\text{O}_2$  and (d) TMB.



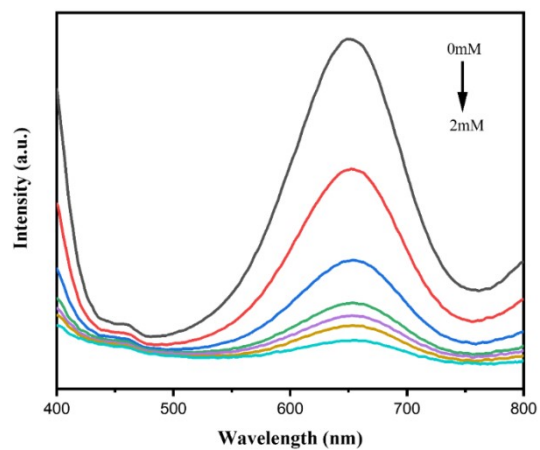

**Fig. S8** The effect of  $\bullet\text{OH}$  scavenger thiourea with different concentrations on the absorbance of  $\text{TMB} + \text{H}_2\text{O}_2 + \text{Fe/Ni-CN}$  reaction system.

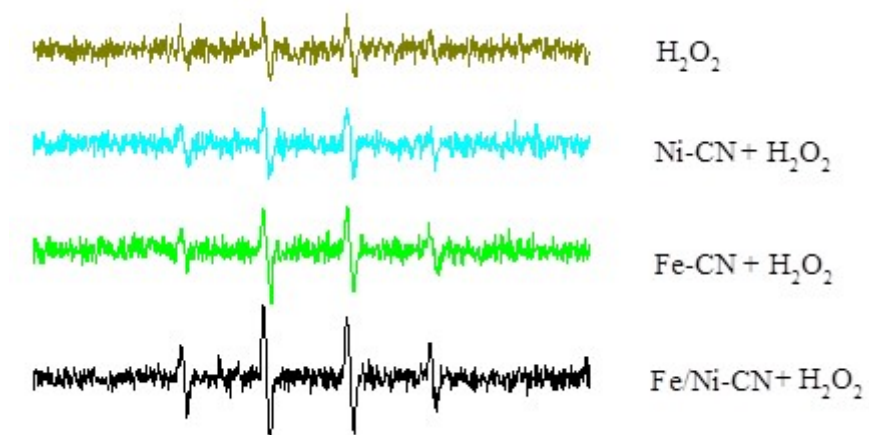

**Fig. S9** The effects of Fe-CN, Ni-CN and Fe/Ni-CN on the formation of hydroxyl radical detected by ESR.

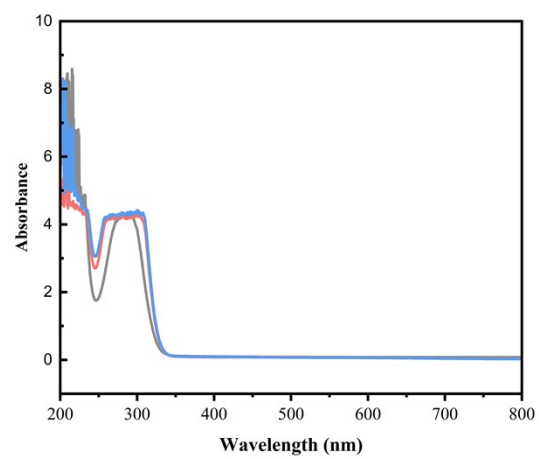

**Fig. S10** The absorption spectra of dyed hair extract solutions with addition of TMB/H<sub>2</sub>O<sub>2</sub>. (blue: blank , red: hair dye 1, gray: hair dye 2).

**Table S1.** BET surface areas and pore volumes of catalysts.

| Samples  | S <sub>BET</sub> (m <sup>2</sup> /g) | pore volume (cm <sup>3</sup> /g) |
|----------|--------------------------------------|----------------------------------|
| CN       | 76.04                                | 0.2571                           |
| Ni-CN    | 91.61                                | 0.3245                           |
| Fe-CN    | 86.32                                | 0.3156                           |
| Fe/Ni-CN | 121.86                               | 0.4611                           |

**Table S2.** Comparison of kinetic parameters of different nanozymes.

| Nanozyme                            | [E] $\mu\text{g/ml}$ | Substrate              | $K_m$ (mM) | $V_{\max}$ ( $\text{M s}^{-1}$ ) | Reference |   |
|-------------------------------------|----------------------|------------------------|------------|----------------------------------|-----------|---|
| Fe/Ni-CN                            | 10                   | TMB                    | 0.052      | $7.43 \times 10^{-8}$            | This work |   |
|                                     |                      | $\text{H}_2\text{O}_2$ | 6.350      | $17.60 \times 10^{-8}$           |           |   |
| Fe-CN                               | 10                   | TMB                    | 0.066      | $7.36 \times 10^{-8}$            |           |   |
|                                     |                      | $\text{H}_2\text{O}_2$ | 33.15      | $9.82 \times 10^{-8}$            |           |   |
| Ni-CN                               | 10                   | TMB                    | 1.05       | $1.43 \times 10^{-8}$            |           |   |
|                                     |                      | $\text{H}_2\text{O}_2$ | 422        | $3.1 \times 10^{-8}$             |           |   |
| Cu NPs/g-<br>$\text{C}_3\text{N}_4$ | 150                  | TMB                    | 0.389      | $5.84 \times 10^{-7}$            |           | 1 |
|                                     |                      | $\text{H}_2\text{O}_2$ | 9.270      | $3.84 \times 10^{-7}$            |           |   |
| MIL-101(Fe)                         | 20                   | TMB                    | 0.585      | $10.038 \times 10^{-8}$          |           | 2 |
|                                     |                      | $\text{H}_2\text{O}_2$ | 0.043      | $5.138 \times 10^{-8}$           |           |   |
| Co-g- $\text{C}_3\text{N}_4$ -2     | 100                  | TMB                    | 0.113      | $8.64 \times 10^{-8}$            | 3         |   |
|                                     |                      | $\text{H}_2\text{O}_2$ | 318.58     | $9.46 \times 10^{-8}$            |           |   |
| $\text{MoS}_2$ @CNN<br>S(30)        | 120                  | TMB                    | 0.117      | $3.03 \times 10^{-8}$            | 4         |   |
|                                     |                      | $\text{H}_2\text{O}_2$ | 0.602      | $3.15 \times 10^{-8}$            |           |   |
| $\text{Fe}_3\text{O}_4$             | 40                   | TMB                    | 0.098      | $3.44 \times 10^{-8}$            | 5         |   |
|                                     |                      | $\text{H}_2\text{O}_2$ | 154        | $9.78 \times 10^{-8}$            |           |   |
| PMCS                                | 100                  | TMB                    | 0.224      | $12.66 \times 10^{-8}$           | 6         |   |
|                                     |                      | $\text{H}_2\text{O}_2$ | 40.160     | $12.15 \times 10^{-8}$           |           |   |
| HRP                                 | $1 \times 10^{-3}$   | TMB                    | 0.430      | $10 \times 10^{-8}$              | 7         |   |
|                                     |                      | $\text{H}_2\text{O}_2$ | 3.700      | $8.70 \times 10^{-8}$            |           |   |

**Table S3.** Calculated energies of the reaction pathway for different catalysts.

| nanozyme | Free energy(ev) |           |           |           |           |
|----------|-----------------|-----------|-----------|-----------|-----------|
|          | $E_{b,1}$       | $E_{b,2}$ | $E_{b,3}$ | $E_{b,4}$ | $E_{b,5}$ |
| Fe/Ni-CN | 0.35            | -2.23     | -1.77     | -2.71     | -3.59     |
| Fe-CN    | 0.64            | -2.67     | -1.88     | -2.86     | -3.59     |
| Ni-CN    | 0.77            | -2.95     | -1.97     | -3.05     | -3.59     |

**Table S4.** Comparison of the proposed method with other reports for the detection of PPD

| Materials                              | Method       | Linear Rang ( $\mu\text{M}$ ) | LOD ( $\mu\text{M}$ ) | Reference |
|----------------------------------------|--------------|-------------------------------|-----------------------|-----------|
| Fe/Ni-CN                               | Colorimetry  | 0.2-30                        | 0.02                  | This work |
| ZnBNC                                  | Colorimetry  | 0.3-10                        | 0.11                  | 8         |
| Fe <sub>3</sub> O <sub>4</sub> /N-GQDs | Colorimetry  | 2-70                          | 0.53                  | 9         |
| Fe-SAs@FNC                             | Colorimetry  | 0.2-50                        | 0.07                  | 10        |
| CDs@NBD                                | Fluorescence | 0.1-10                        | 0.056                 | 11        |
| HRP/NPG/GE                             | ECL          | 2-170                         | 0.33                  | 12        |
| S-PPD-DCM                              | Fluorescence | 0.09-9                        | 0.05                  | 13        |

- 1 N. Wang, Z. W. Han, H. Fan and S. Y. Ai, *RSC Advances*, 2015, **5**, 91302-91307.
- 2 J. J. Guo, S. Wu, Y. Wang and M. Zhao, *Sensors and Actuators B: Chemical*, 2020, **312**, 128021.
- 3 J. S. Mu, J. Li, X. Zhao, E. C. Yang and X. J. Zhao, *RSC Adv.*, 2016, **6**, 35568-35576.
- 4 P. Ju, Y. H. He, M. Wang, X. X. Han, F. H. Jiang, C. J. Sun and C. Wu, *Nanomaterials (Basel)*, 2018, **8**, 976.
- 5 L. Z. Gao, J. Zhuang, L. Nie, J. B. Zhang, Y. Zhang, N. Gu, T. H. Wang, J. Feng, D. L. Yang, S. Perrett and X. Y. Yan, *Nat. Nanotechnol.*, 2007, **2**, 577-583.
- 6 B. L. Xu, H. Wang, W. W. Wang, L. Z. Gao, S. S. Li, X. T. Pan, H. Y. Wang, H. L. Yang, X. Q. Meng, Q. W. Wu, L. R. Zheng, S. M. Chen, X. H. Shi, K. L. Fan, X. Y. Yan and H. Y. Liu, *Angew Chem Int Ed Engl*, 2019, **58**, 4911-4916.
- 7 Y. Chen, H. Zou, B. Yan, X. J. Wu, W. W. Cao, Y. H. Qian, L. Zheng and G. W. Yang, *Adv. Sci.*, 2022, **9**, 2103977.
- 8 M. Feng, Q. Zhang, X. F. Chen, D. Deng, X. Y. Xie and X. P. Yang, *Biosens. Bioelectron.*, 2022, **210**, 114294.
- 9 B. F. Shi, Y. B. Su, L. L. Zhang, M. J. Huang, X. F. Li and S. L. Zhao, *Nanoscale*, 2016, **8**, 10814-10822.
- 10 X. F. Chen, M. Feng, X. Y. Xie, Y. Zhang, J. Zhang and X. P. Yang, *Talanta*, 2022, **246**, 123487.
- 11 W. J. Wang, J. M. Xia, X. Hai, M. L. Chen and J. H. Wang, *Environmental Science: Nano*, 2017, **4**, 1037-1044.
- 12 C. Wu, Z. Liu, H. H. Sun, X. Wang and P. Xu, *Biosens. Bioelectron.*, 2016, **79**, 843-849.
- 13 S. L. Zhang, B. F. Liu, D. Y. Hu, S. L. Zhang, Y. B. Pei and Z. J. Gong, *Anal. Chim. Acta*, 2020, **1139**, 189-197.
